# Supplementary material for: A facile preparation of targetable pH-sensitive polymeric nanocarriers with encapsulated magnetic nanoparticles for controlled drug release
Source: Royal Society of Chemistry journal article supplement (doi:10.1039/c2jm34817a), 2012-01-01
Supplement: c2jm34817a.pdf [file c2jm34817a.pdf]

# **A facile preparation of targetable pH-sensitive polymeric nanocarriers with encapsulated magnetic nanoparticles for controlled drug release**

**Shun Yang, Dongyun Chen, Najun Li\*, Xiao Mei, Xiuxiu Qi, Hua Li, Qingfeng Xu and Jianmei Lu\***

Key Laboratory of Organic Synthesis of Jiangsu Province, College of Chemistry, Chemical Engineering and Materials Science, Soochow University, Suzhou, China 215123.

E-mail: [lujm@suda.edu.cn](mailto:lujm@suda.edu.cn), [linajun@suda.edu.cn](mailto:linajun@suda.edu.cn); Fax: +86 (0) 512-6588 0367; Tel:

+86 (0)512-6588 0368

## **Supplementary Information**

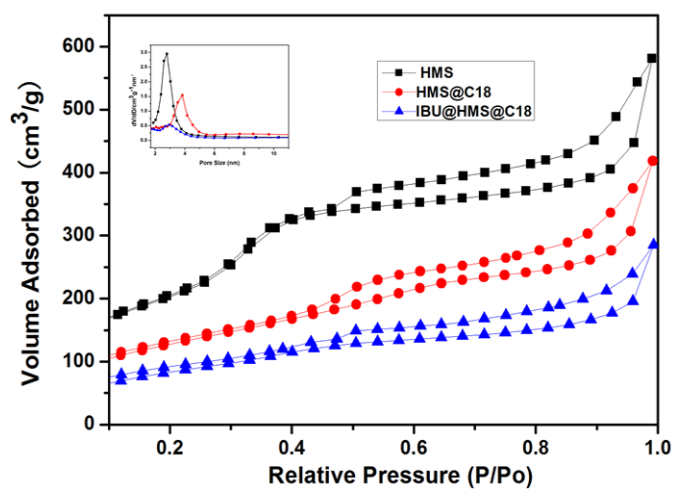

**Fig. S1** N<sub>2</sub> adsorption-desorption isotherm and the corresponding pore size distribution inset of HMS, HMS@C18 and (c) IBU@HMS@C18.

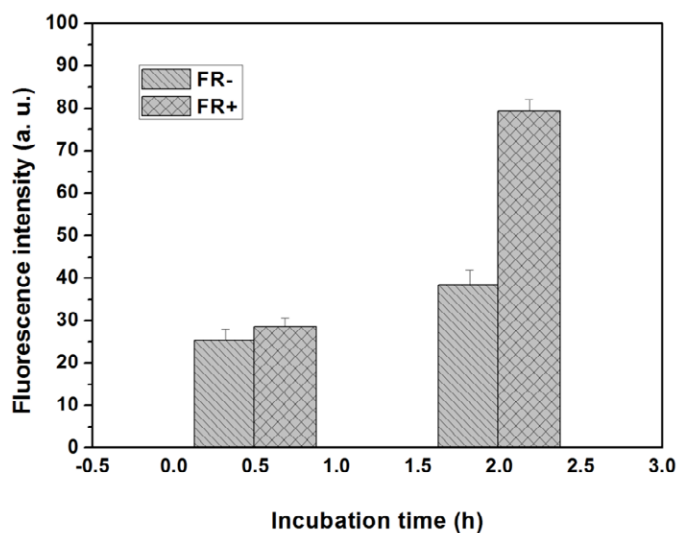

**Fig. S2** Mean fluorescence intensity on FR+ and FR- cells with HAMAFA-*b*-DBAM-coated DOX@HMS@C18@SPIONPs in solution at different incubation times.

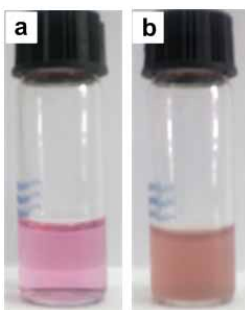

**Fig. S3** Photograph of the dispersion stability of nanocarrier in a serum-containing medium.

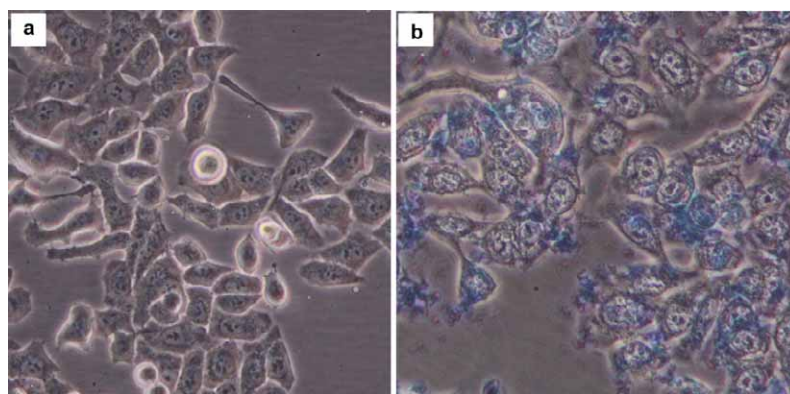

**Fig. S4** The photographs of intracellular accumulation of SPIONPs (a) before and (b) after stained by Prussian Blue (took by Microscope ST-590UZ, Olympus, Japan.)
